# Supplementary material
Source: Copernicus journal article supplement (doi:10.5194/bg-23-3605-2026)
Supplement: Supplementary file 1 [file bg-23-3605-2026-supplement.pdf]

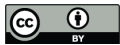

*Supplement of*

**Limited iron isotope variation among tissues of a marine fish: a case study of wild chub mackerel (*Scomber japonicus*)**

**Nanako Hasegawa et al.**

*Correspondence to:* Nanako Hasegawa (n-hasegawa@vetmed.hokudai.ac.jp)

The copyright of individual parts of the supplement might differ from the article licence.

1 **Supplementary material**

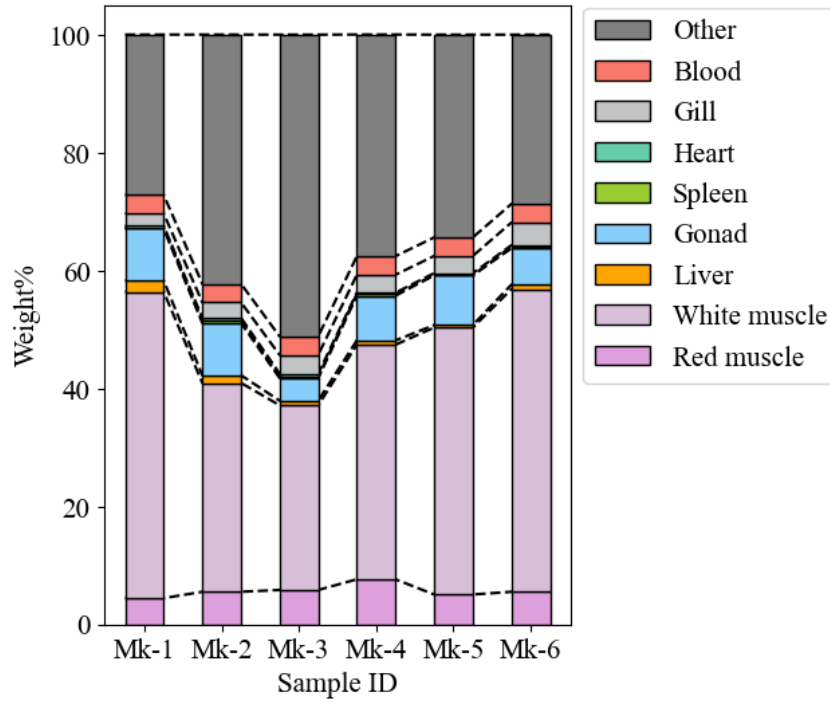

2

3 **Figure S1: Proportion of wet weight of chub mackerel tissues per body weight.**

4

5

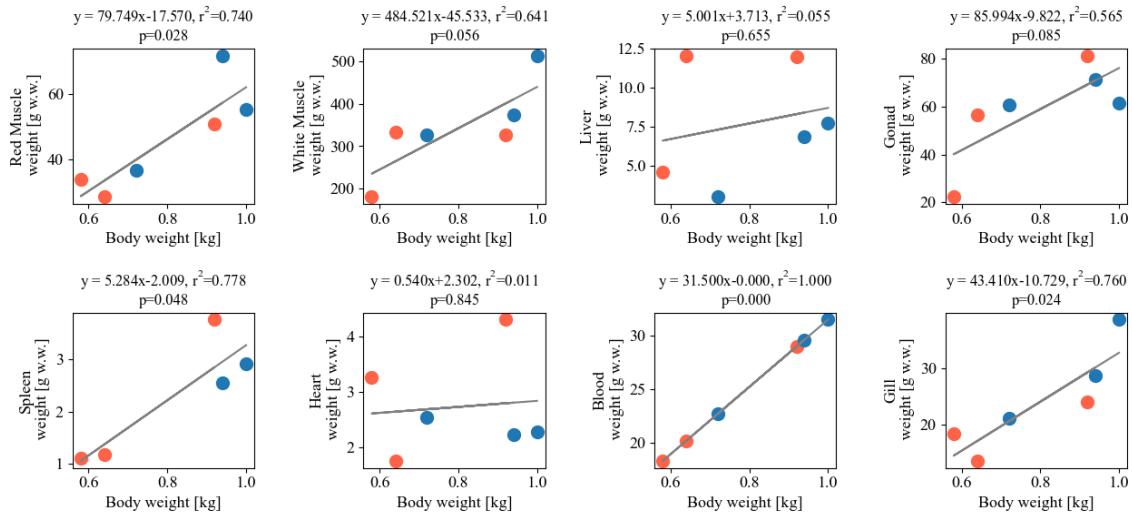

6

7

8 **Figure S2: Correlation between tissue weight and total body weight. Red circles**  
 9 **represent females, and blue circles represent males. Black lines show the linear**  
 10 **regression of all data points.**

11

12

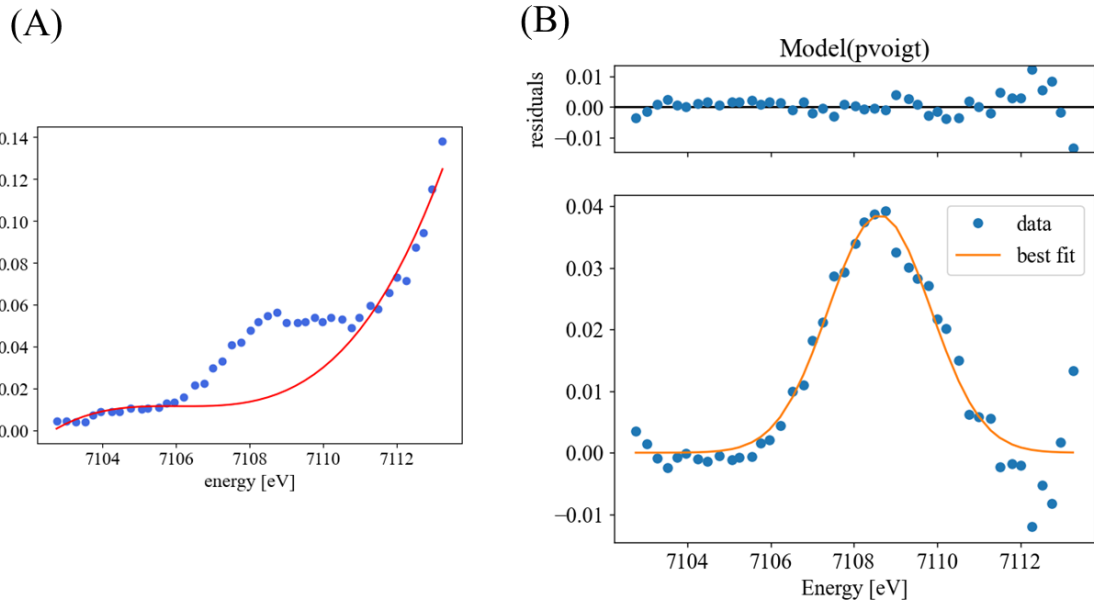

13

14 **Figure S3: Example of pre-edge curve fitting. Blue dots in panel (A) represent the**  
15 **raw spectra around the pre-edge peak. The red line is a spline curve fitted to the raw**  
16 **spectra excluding the pre-edge region. The dots in panel (B) show the data obtained**  
17 **by subtracting the spline curve from the raw spectra. The orange line represents the**  
18 **fitted pseudo-Voigt model.**

19

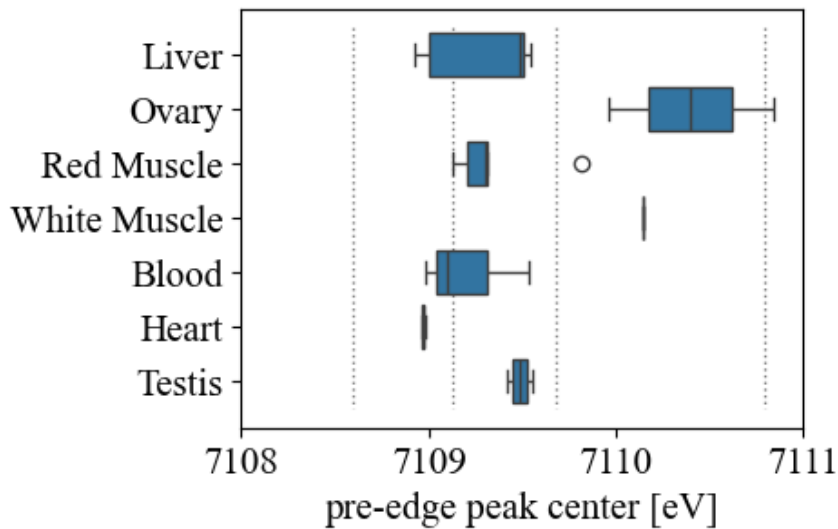

20 **Figure S4: Pre-edge peak energies in the spectra of chub mackerel tissues. Gray**  
21 **dotted lines indicate the values for the following standard materials: horse spleen**  
22 **ferritin (Hs-Ft; 7110.8 eV), bovine blood methemoglobin (Bb-metHb; 7109.7 eV),**  
23 **bovine blood oxyhemoglobin (Bb-oxyHb; 7109.1 eV), and bovine deoxyhemoglobin**  
24 **(Bb-deoxyHb; 7108.6 eV)**

25

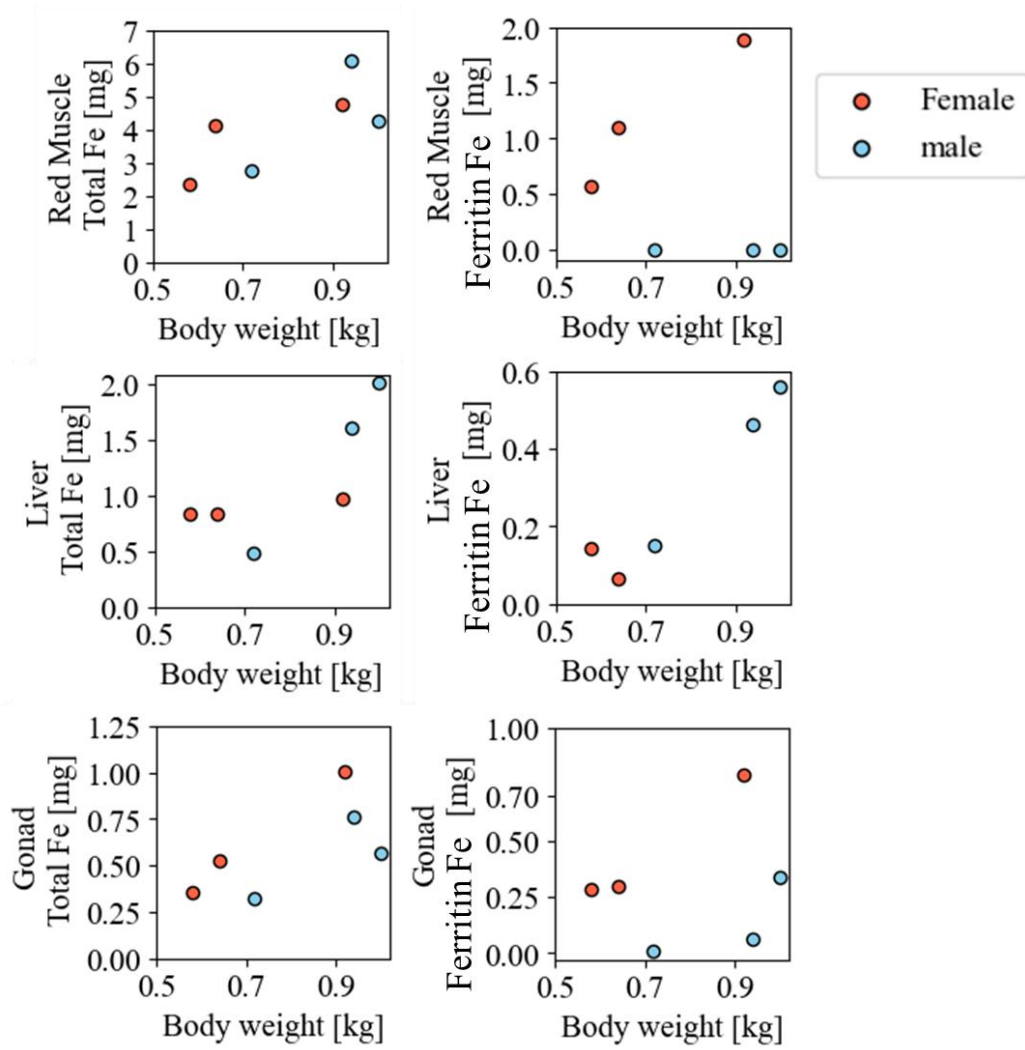

26  
 27  
 28  
 29  
 30  
 31

**Figure S5: Correlations between body weights and iron content in either the total tissue compartment or the ferritin reservoir. Red circles represent females, and blue circles represent males.**

32  
33  
34

**Table S1: Weight, Fe concentration and stable isotope ratio in chub mackerel tissues (Blood volume is calculated as 30 mL/kg Body weight, and 1.05 as specific gravity according to Olson, 1992 and Davison, 2011).**

| Sample ID | Tissue       | $\delta^{56}\text{Fe} \pm 2 \text{ S.E.}^*$ | Wet weight [g] | Dry weight [g] | Moisture ratio% | Tissue weight per body weight% | Fe conc. [ $\mu\text{g/g}$ w.w.] | Fe conc. [ $\mu\text{g/g}$ d.w.] | Total Fe [mg] | Total Fe% |
|-----------|--------------|---------------------------------------------|----------------|----------------|-----------------|--------------------------------|----------------------------------|----------------------------------|---------------|-----------|
| Mk-1      | Red Muscle   | -1.5 ± 0.05                                 | 28.5           | 13.0           | 54.5            | 4.46                           | 144                              | 318                              | 4.12          | 30.2      |
| Mk-1      | White Muscle | -1.39 ± 0.05                                | 333            | 109            | 67.1            | 52.0                           | 4.01                             | 12.2                             | 1.33          | 9.76      |
| Mk-1      | Liver        | -1.21 ± 0.04                                | 12.1           | 2.94           | 75.6            | 1.89                           | 68.9                             | 283                              | 0.833         | 6.1       |
| Mk-1      | Gonad        | -1.48 ± 0.09                                | 56.4           | 23.5           | 58.3            | 8.81                           | 9.34                             | 22.4                             | 0.527         | 3.86      |
| Mk-1      | Spleen       | -1.26 ± 0.04                                | 1.18           | 0.264          | 77.5            | 0.184                          | 721                              | 3210                             | 0.849         | 6.22      |
| Mk-1      | Heart        | -1.4 ± 0.05                                 | 1.76           | 0.374          | 78.8            | 0.275                          | 121                              | 569                              | 0.213         | 1.56      |
| Mk-1      | Blood        | -1.29 ± 0.04                                | 20.2           | 3.73           | 81.5            | 3.15                           | 222                              | 1200                             | 4.48          | 32.8      |
| Mk-1      | Gill         | -1.2 ± 0.01                                 | 13.5           | 3.95           | 70.8            | 2.11                           | 96.2                             | 330                              | 1.30          | 9.52      |
| Mk-2      | Red Muscle   | -1.56 ± 0.03                                | 51.0           | 24.5           | 51.9            | 5.54                           | 93.5                             | 194                              | 4.77          | 27.5      |
| Mk-2      | White Muscle | -1.5 ± 0.04                                 | 326            | 142            | 56.6            | 35.4                           | 4.50                             | 10.4                             | 1.47          | 8.46      |
| Mk-2      | Liver        | -1.25 ± 0.002                               | 12.0           | 2.82           | 76.5            | 1.30                           | 80.5                             | 343                              | 0.966         | 5.58      |
| Mk-2      | Gonad        | -1.21 ± 0.06                                | 81.5           | 38.6           | 52.7            | 8.86                           | 12.3                             | 26.0                             | 1.00          | 5.8       |
| Mk-2      | Spleen       | -1.46 ± 0.04                                | 3.76           | 0.703          | 81.3            | 0.409                          | 431                              | 2310                             | 1.62          | 9.37      |
| Mk-2      | Heart        | -1.51 ± 0.06                                | 4.30           | 0.77           | 82.1            | 0.468                          | 70.4                             | 394                              | 0.303         | 1.75      |
| Mk-2      | Blood        | -1.42 ± 0.04                                | 29.0           | 5.14           | 82.3            | 3.15                           | 196                              | 1110                             | 5.69          | 32.8      |
| Mk-2      | Gill         | -1.34 ± 0.07                                | 24.0           | 6.63           | 72.3            | 2.61                           | 63.1                             | 228                              | 1.51          | 8.73      |
| Mk-3      | Red Muscle   | -1.53 ± 0.04                                | 33.9           | 8.35           | 75.4            | 5.85                           | 68.9                             | 280                              | 2.34          | 21.7      |
| Mk-3      | White Muscle | -1.53 ± 0.04                                | 182            | 42.7           | 76.5            | 31.3                           | 4.77                             | 20.3                             | 0.867         | 8.05      |
| Mk-3      | Liver        | -1.2 ± 0.04                                 | 4.57           | 1.20           | 73.8            | 0.788                          | 182                              | 695                              | 0.831         | 7.71      |
| Mk-3      | Gonad        | -1.5 ± 0.06                                 | 22.3           | 7.70           | 65.4            | 3.84                           | 16.1                             | 46.5                             | 0.359         | 3.33      |
| Mk-3      | Spleen       | -1.39 ± 0.04                                | 1.11           | 0.311          | 72.0            | 0.191                          | 891                              | 3180                             | 0.988         | 9.17      |
| Mk-3      | Heart        | -1.42 ± 0.04                                | 3.27           | 0.668          | 79.6            | 0.564                          | 262                              | 1280                             | 0.858         | 7.96      |
| Mk-3      | Blood        | -1.39 ± 0.03                                | 18.3           | 2.93           | 83.9            | 3.15                           | 174                              | 1090                             | 3.18          | 29.5      |
| Mk-3      | Gill         | -1.43 ± 0.04                                | 18.3           | 4.17           | 77.3            | 3.16                           | 73.6                             | 324                              | 1.35          | 12.5      |
| Mk-4      | Red Muscle   | -1.66 ± 0.04                                | 72.0           | 28.0           | 61.1            | 7.66                           | 84.7                             | 218                              | 6.09          | 24.7      |
| Mk-4      | White Muscle | -1.58 ± 0.03                                | 374            | 112            | 70.1            | 39.8                           | 3.71                             | 12.4                             | 1.39          | 5.63      |
| Mk-4      | Liver        | -1.07 ± 0.04                                | 6.88           | 1.88           | 72.7            | 0.732                          | 234                              | 858                              | 1.61          | 6.53      |
| Mk-4      | Gonad        | -1.04 ± 0.06                                | 71.2           | 16.0           | 77.6            | 7.58                           | 10.7                             | 47.6                             | 0.761         | 3.09      |
| Mk-4      | Spleen       | -1.43 ± 0.04                                | 2.54           | 0.648          | 74.5            | 0.271                          | 873                              | 3430                             | 2.22          | 9.01      |
| Mk-4      | Heart        | -1.49 ± 0.03                                | 2.24           | 0.523          | 76.6            | 0.238                          | 121                              | 517                              | 0.27          | 1.1       |
| Mk-4      | Blood        | -1.28 ± 0.05                                | 29.6           | 6.06           | 79.5            | 3.15                           | 349                              | 1700                             | 10.3          | 41.9      |
| Mk-4      | Gill         | -1.37 ± 0.04                                | 28.6           | 7.76           | 72.8            | 3.04                           | 69.0                             | 254                              | 1.97          | 7.99      |
| Mk-5      | Red Muscle   | -1.36 ± 0.05                                | 36.6           | 9.83           | 73.1            | 5.08                           | 75.0                             | 279                              | 2.75          | 22.8      |
| Mk-5      | White Muscle | -1.26 ± 0.08                                | 326            | 87.9           | 73.0            | 45.3                           | 6.28                             | 23.3                             | 2.05          | 17        |
| Mk-5      | Liver        | -1.3 ± 0.05                                 | 3.01           | 0.793          | 73.7            | 0.419                          | 162                              | 616                              | 0.488         | 4.06      |
| Mk-5      | Gonad        | -1.26 ± 0.03                                | 60.8           | 12.0           | 80.3            | 8.45                           | 5.29                             | 26.8                             | 0.322         | 2.68      |
| Mk-5      | Spleen       | NA                                          | NA             | NA             | NA              | NA                             | NA                               | NA                               | NA            | NA        |
| Mk-5      | Heart        | -1.24 ± 0.06                                | 2.54           | 0.542          | 78.7            | 0.353                          | 144                              | 677                              | 0.367         | 3.05      |
| Mk-5      | Blood        | -1.4 ± 0.06                                 | 22.7           | 4.5            | 80.1            | 3.15                           | 206                              | 1040                             | 4.68          | 38.9      |
| Mk-5      | Gill         | -1.34 ± 0.04                                | 21.1           | 5.22           | 75.2            | 2.92                           | 65.1                             | 263                              | 1.37          | 11.4      |
| Mk-6      | Red Muscle   | -1.65 ± 0.05                                | 55.4           | 18.3           | 66.9            | 5.54                           | 77.3                             | 233                              | 4.28          | 17.7      |
| Mk-6      | White Muscle | -1.47 ± 0.05                                | 513            | 150            | 70.8            | 51.3                           | 3.85                             | 13.2                             | 1.98          | 8.19      |
| Mk-6      | Liver        | -1.11 ± 0.05                                | 7.74           | 2.02           | 73.9            | 0.774                          | 259                              | 993                              | 2.01          | 8.31      |
| Mk-6      | Gonad        | -0.92 ± 0.05                                | 61.6           | 10.9           | 82.2            | 6.16                           | 9.17                             | 51.7                             | 0.565         | 2.34      |
| Mk-6      | Spleen       | -1.3 ± 0.05                                 | 2.92           | 0.724          | 75.2            | 0.292                          | 875                              | 3530                             | 2.56          | 10.6      |
| Mk-6      | Heart        | -1.53 ± 0.05                                | 2.29           | 0.491          | 78.6            | 0.229                          | 185                              | 865                              | 0.425         | 1.76      |
| Mk-6      | Blood        | -1.58 ± 0.04                                | 31.5           | 5.85           | 81.4            | 3.15                           | 275                              | 1480                             | 8.7           | 35.9      |
| Mk-6      | Gill         | -1.56 ± 0.05                                | 38.5           | 10.5           | 72.9            | 3.85                           | 94.8                             | 349                              | 3.65          | 15.1      |

35

\*2 S.E. in  $\delta^{56}\text{Fe}$  represents the standard error during single analysis (60 analytical cycles)

36 **Table S2.** Whole-body iron isotope ratio ( $\delta_{WB}$ ), and isotope ratios in liver ferritin ( $\delta_{Ft}$ ) and  
 37 heme ( $\delta_{Hm}$ ) iron compartments in each chub mackerel specimen. The  $\delta_{WB}$  values were  
 38 calculated according to Eq.4. The  $\delta_{Hm}$  value is assumed to be  $-1.66\%$ , the lowest value  
 39 among mackerel samples. The  $\delta_{Ft}$  values were estimated from Eq.6. The value  $\Delta$  represents  
 40 isotope fractionation between  $\delta_{Ft}$  and  $\delta_{Hm}$  (i.e.  $\Delta = \delta_{Ft} - \delta_{Hm}$ ).

| Sample ID | $\delta_{net}$ | $\delta_{Ft}$ | $\delta_{Hm}$ | $\Delta$ |
|-----------|----------------|---------------|---------------|----------|
| Mk-1      | -1.36          | 3.96          | -1.66         | 5.62     |
| Mk-2      | -1.44          | NA            | -1.66         | NA       |
| Mk-3      | -1.43          | 1.1           | -1.66         | 2.76     |
| Mk-4      | -1.39          | 0.516         | -1.66         | 2.18     |
| Mk-5      | -1.35          | -0.513        | -1.66         | 1.15     |
| Mk-6      | -1.50          | 0.281         | -1.66         | 1.94     |

41  
 42

43 **Principal Component Analysis of XANES**

44 Evaluation by Linear combination fitting (LCF) carries the risk of incorrectly  
 45 identifying components not originally present in the sample when too many components  
 46 are included in the fitting. To address this, the number of contributing components was  
 47 determined using principal component analysis (PCA) and target transformation analysis,  
 48 as described by (Ressler et al., 2000) and (Martini et al., 2020). PCA of XANES spectra  
 49 was performed using the singular value decomposition (SVD) algorithm, expressed as  
 50 follows:

$$[A] = [E] \cdot [V] \cdot [w]^t \quad (S - 1)$$

51 This means that any  $m \times n$  matrix A (where  $m \geq n$ ) can be decomposed into the product  
 52 of an  $m \times n$  column-orthogonal matrix E, an  $n \times n$  diagonal matrix V, and the transpose  
 53 of an  $n \times n$  orthogonal matrix w. The matrix A was constructed so that each column  
 54 represented a sample XANES spectrum interpolated onto the same energy grid. The  
 55 singular values, represented by the diagonal elements of V, were determined so that the  
 56 singular values, represented by the diagonal elements of V, were determined so that the  
 57 experimental spectra can be reconstructed by the minimal number of components which  
 58 is equal to the principal component. The singular values of SVD results for the XANES  
 59 spectra of the mackerel tissue samples indicated that approximately three to four  
 60 components were sufficient to reconstruct the spectra (Figure S6).

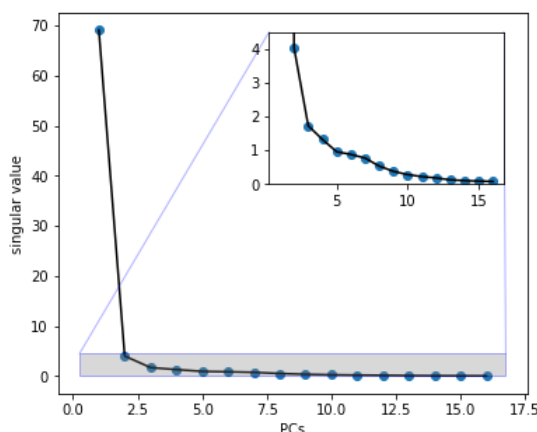

**Figure S6: SVD result of the tissue spectra.**

61 Next, sample spectra were reconstructed using one to three singular values from  
 62 matrix V, as expressed as:

$$[E] \cdot [V^*] \cdot [w]^t = [A^*] \quad (S - 2)$$

63 where the matrix  $A^*$  represents the reconstructed sample spectra, and  $V^*$  is an  $n \times n$   
 64 diagonal matrix whose diagonal elements consist of a selected subset of elements from V.  
 65 For example, if two singular values are sufficient for reconstruction,  $V^*$  is given by:

$$[V^*] = \begin{bmatrix} v_{11} & 0 & 0 & \dots & 0 \\ 0 & v_{22} & 0 & \dots & 0 \\ 0 & 0 & 0 & \dots & 0 \\ \vdots & \vdots & \vdots & \ddots & \vdots \\ 0 & 0 & 0 & \dots & 0 \end{bmatrix} \quad (S - 3)$$

66  
 67  
 68 The reconstructed spectra of fish tissue samples are shown in Figure B. The  
 69 results indicate subtle differences between the original sample spectra and the  
 70 reconstructed spectra when using  $V^*$  with only one or two singular values (i.e. one or two

71 principal components), whereas using three principal components reproduces the sample  
72 spectra accurately (Figure S7).

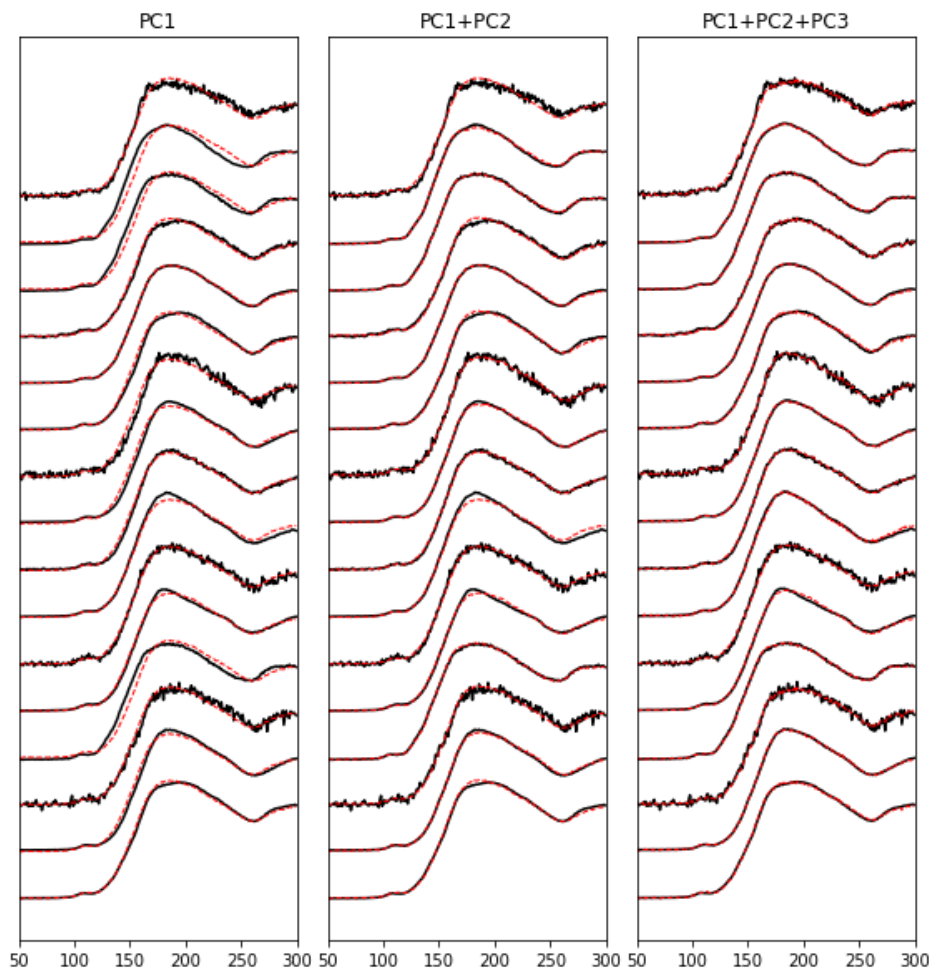

73

**Figure S7: Reconstructed sample spectra from PCA results. Black lines represent the measured spectra, and red lines represent the reconstructed spectra.**

74 To identify the standard materials that best fit the sample spectra, target  
75 transformation analysis was conducted. This analysis uses matrix E from the SVD results  
76 as follows:

$$77 \quad [T^*] = [E] \cdot [E]^t \cdot [T] \quad (S - 4)$$

78 where T is a vector constructed from the XANES spectrum of standard materials. If the  
79 reconstructed vector T\* closely matches T within experimental error, T is confirmed as a  
80 principal component of the sample spectra A. The target transformation results for various  
81 standard materials (Hs-ferritin, Bb-metHb, Bb-oxyHb, Bb-deoxyHb, Fe<sub>3</sub>O<sub>4</sub>, ferrihydrite,  
82 FeS, and hematite) are shown in Figure S8. These results indicated that ferritin and  
83 hemoglobin derivatives were principal components of the sample spectra, while other  
84 materials were not well reproduced. Because ferritin contains ferrihydrite-like  
85 nanoparticles within its cavity (Harrison et al., 1967; Theil, 1987), the similarity between

86 the XANES spectra of ferritin and ferrihydrite allows for accurate reconstruction of the  
87 ferrihydrite spectrum from the sample spectra.  
88  
89

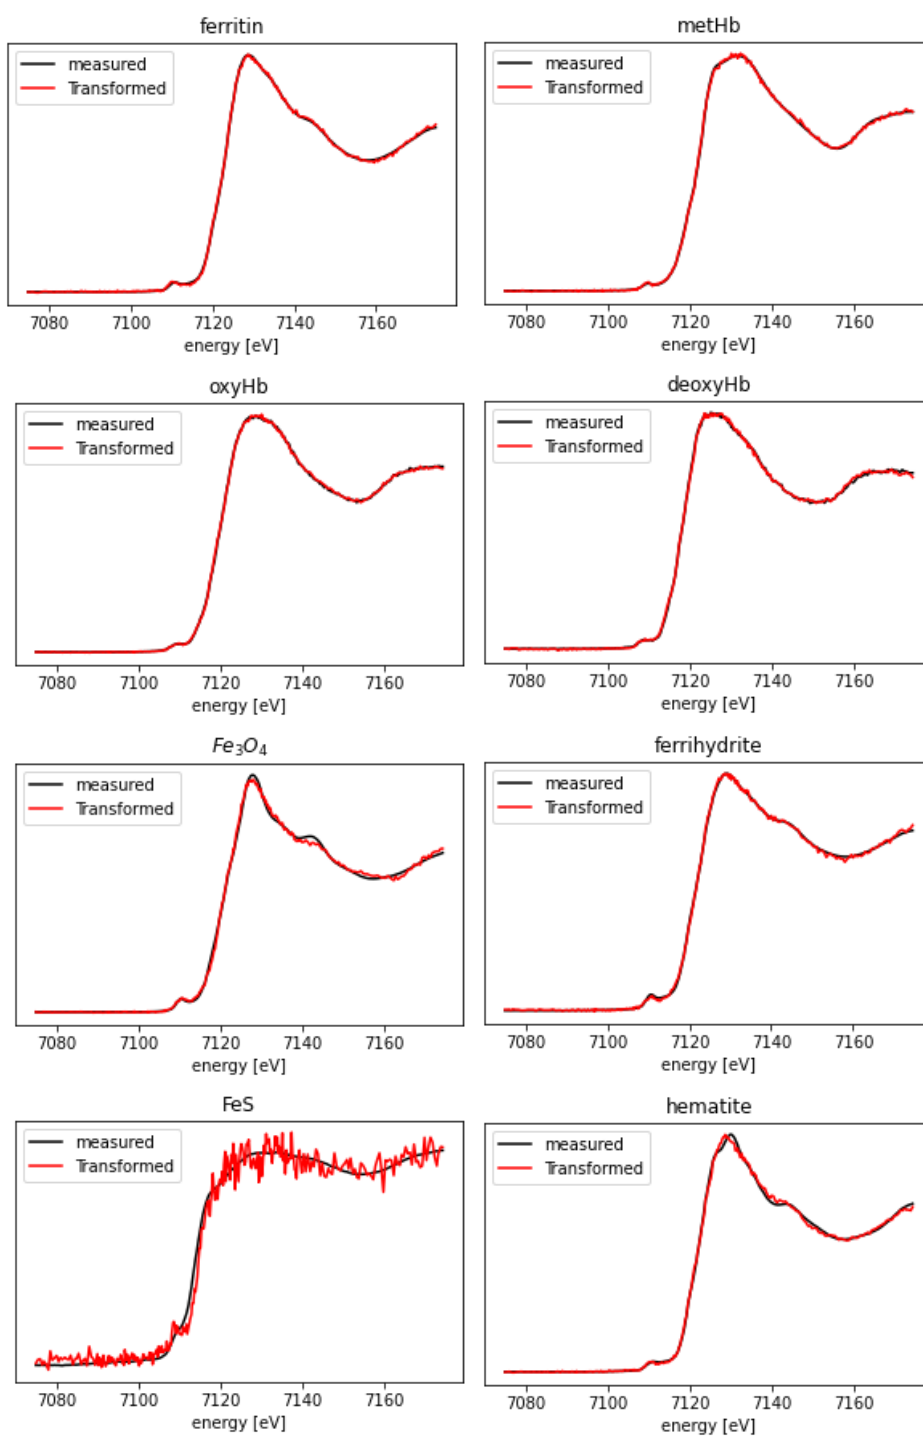

**Figure S8: Results of target transformation of standard materials. Black lines represent the measured spectra, and red lines represent the transformed**

91

92

## References

93

Harrison, P. M., Fischbach, F. A., Hoy, T. G., and Haggis, G. H.: Ferric Oxyhydroxide Core of Ferritin, *Nature*, 216, 1188–1190, doi: 10.1038/2161188a0, 1967.

94

95

Martini, A., Guda, S. A., Guda, A. A., Smolentsev, G., Algasov, A., Usoltsev, O., Soldatov, M. A., Bugaev, A., Rusalev, Yu., Lamberti, C., and Soldatov, A. V.: PyFitit: The software for quantitative analysis of XANES spectra using machine-learning algorithms, *Comput Phys Commun*, 250, 107064, doi: 10.17632/ydkgfdc38t.1, 2020.

96

97

98

99

100

101

102

Ressler, T., Wong, J., Roos, J., and Smith, I. L.: Quantitative speciation of mn-bearing particulates emitted from autos burning (methylcyclopentadienyl) manganese tricarbonyl-added gasolines using XANES spectroscopy, *Environ Sci Technol*, 34, 950–958, doi: 10.1021/es990787x, 2000.

103

104

105

106

Theil, E. C.: Ferritin: structure, gene regulation, and cellular function in animals, plants, and microorganisms., *Annu Rev Biochem*, 56, 289–315, doi: 10.1146/annurev.bi.56.070187.001445, 1987.

107
